# Supplementary material for: Computational selection of antibody-drug conjugate targets for breast cancer
Source: PubMed Central journal article supplement (PMC4823055; doi:10.18632/oncotarget.6679), 2015-12-19
Supplement: oncotarget-07-2555-s001.pdf [file oncotarget-07-2555-s001.pdf]

## SUPPLEMENTARY MATERIAL AND METHODS, TABLES AND FIGURES

GEO series.

GSE10006, GSE10041, GSE10191, GSE10281, GSE10616, GSE10714, GSE10715, GSE10780, GSE10791, GSE10799, GSE10810, GSE11001, GSE11024, GSE11045, GSE11151, GSE11375, GSE1145, GSE11504, GSE11784, GSE11831, GSE12187, GSE12276, GSE12763, GSE12790, GSE12917, GSE13159, GSE13204, GSE13355, GSE13367, GSE13501, GSE13787, GSE13849, GSE13904, GSE13933, GSE14334, GSE14580, GSE14668, GSE14762, GSE14905, GSE15061, GSE15471, GSE15543, GSE15605, GSE15932, GSE16161, GSE16391, GSE16446, GSE16515, GSE16538, GSE16728, GSE16879, GSE17183, GSE17312, GSE17476, GSE17700, GSE17816, GSE17818, GSE17895, GSE17907, GSE18105, GSE18123, GSE18728, GSE18781, GSE18842, GSE18864, GSE18995, GSE19188, GSE19249, GSE19615, GSE19650, GSE19697, GSE19743, GSE19804, GSE20307, GSE20489, GSE20685, GSE20711, GSE20713, GSE20916, GSE2109, GSE21422, GSE21510, GSE21610, GSE21653, GSE21816, GSE22035, GSE22229, GSE22459, GSE22513, GSE22544, GSE22598, GSE22619, GSE22780, GSE22840, GSE23177, GSE23343, GSE23593, GSE23604, GSE23630, GSE23720, GSE24006, GSE24206, GSE24223, GSE26049, GSE26378, GSE26440, GSE26457, GSE26554, GSE26639, GSE26713, GSE26910, GSE28536, GSE28583, GSE28619, GSE28694, GSE28750, GSE28796, GSE28821, GSE28826, GSE28844, GSE29044, GSE29431, GSE29691, GSE29721, GSE29722, GSE29819, GSE29919, GSE30010, GSE30418, GSE31192, GSE31210, GSE31448, GSE32646, GSE32676, GSE32688, GSE32887, GSE32924, GSE33075, GSE33356, GSE33532, GSE33658, GSE34748, GSE3526, GSE35925, GSE36076, GSE36771, GSE36774, GSE37031, GSE37267, GSE37364, GSE3744, GSE37455, GSE37460, GSE37463, GSE37768, GSE38554, GSE38713, GSE38941, GSE39612, GSE40231, GSE40791, GSE40837, GSE4107, GSE41328, GSE4183, GSE42109, GSE42114, GSE42568, GSE43346, GSE43365, GSE43502, GSE4488, GSE45267, GSE45436, GSE46474, GSE47109, GSE47389, GSE48060, GSE48311, GSE48390, GSE48391, GSE50567, GSE50628, GSE50948, GSE51024, GSE52322, GSE52360, GSE52746, GSE53223, GSE5350, GSE53757, GSE5460, GSE54837, GSE55201, GSE55594, GSE56808, GSE5764, GSE58294, GSE58792, GSE59312, GSE6351, GSE6460, GSE6532, GSE6764, GSE7023, GSE7307, GSE7515, GSE7869, GSE7904, GSE8050, GSE8121, GSE8545, GSE8581, GSE8671, GSE8977, GSE9086, GSE9195, GSE9196, GSE9254, GSE9452, GSE9489, GSE9493, GSE9686, GSE9692.

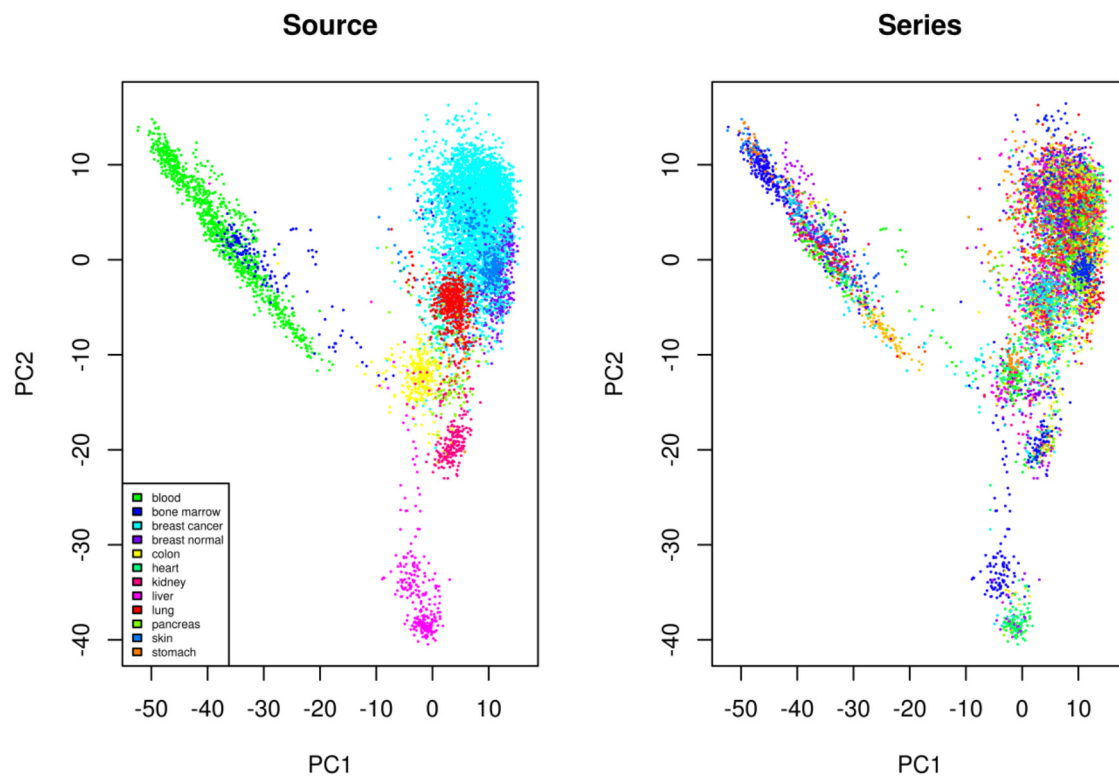

**Supplementary Figure S1: Plot of the first and the second principal components in 8,628 breast cancer and normal tissue samples.** Left, samples are colored by organ/tissue source. Right, samples are colored by series (experiments).

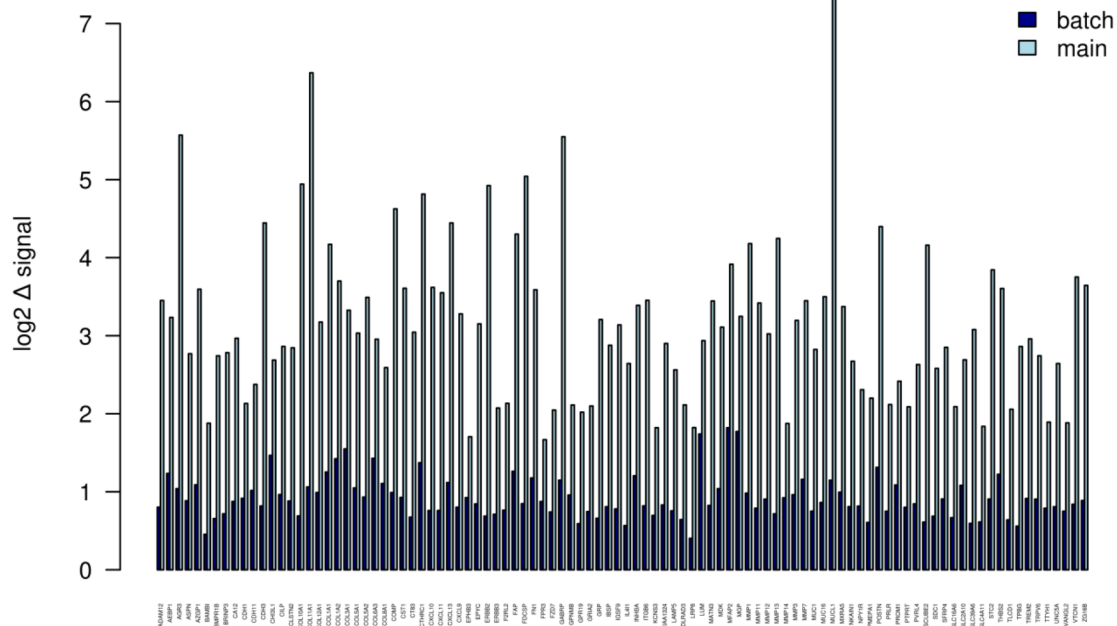

**Supplementary Figure S2: Barplot of experiment (batch) effect compared to the amplitude of differential expression in cancer versus normal tissues samples (main) for 100 candidate targets.**

**Supplementary Table S1: Assigned NCI60 cell line classes.**

| Class       | Cell lines                                                                                                                                                              |
|-------------|-------------------------------------------------------------------------------------------------------------------------------------------------------------------------|
| Epithelial  | COLO205, HCC2998, HCT116, HCT15, HT29, KM12, MCF7, NCIH322M, OVCAR3, OVCAR4, SW620, T47D                                                                                |
| Mesenchymal | 7860, A498, ACHN, BT549, CAK11, HOP62, HOP92, HS578T, LOXIMVI, MDAMB231, NCIADRRES, NCIH226, OVCAR8, RXF393, SF268, SF295, SF539, SN12C, SNB19, SNB75, TK10, U251, UO31 |
| Mixed       | A549, DU145, EKVX, IGROV1, NCIH23, NCIH460, NCIH522, OVCAR5, PC3, SKOV3                                                                                                 |
| Leukemia    | CCRFCEM, HL60, K562, MOLTA, RPMI8226, SR                                                                                                                                |
| Melanoma    | M14, MALME3M, MDAMB435, SKMEL2, SKMEL28, SKMEL5, UACC257, UACC62                                                                                                        |

**Supplementary Table S2: Predicted cell line classes in the GlaxoSmithKline collection.**

| Class       | Cell lines                                                                                                                                                                                                                                                                                                                                                                                                                                                                                                                                                                                                                                                                                                                                                                           |
|-------------|--------------------------------------------------------------------------------------------------------------------------------------------------------------------------------------------------------------------------------------------------------------------------------------------------------------------------------------------------------------------------------------------------------------------------------------------------------------------------------------------------------------------------------------------------------------------------------------------------------------------------------------------------------------------------------------------------------------------------------------------------------------------------------------|
| Epithelial  | 22RV1, 5637, 647V, AGS, ASPC1, BEWO, BFTC905, BT20, BT474, C4I, C4II, CAHPV10, CAO3, CAPAN1, CAPAN2, CHAGOK1, COLO201, COLO668, CORL105, CORL23, DETROIT562, DMS153, DMS53, DOTC2, DU4475, EFM19, FADU, HCC1143, HCC1599, HCC1937, HCC1954, HCC2157, HCC2218, HCC38, HCT8, HEC1A, HPAC, HPAFII, HT1197, HT1376, HT3, HUPT4, JAR, JEG3, KATOIII, KPL1, KYSE30, LS1034, LS174T, MDAMB175VII, MDAMB453, MT3, NCIH1395, NCIH1437, NCIH1573, NCIH1623, NCIH1650, NCIH1666, NCIH1838, NCIH1993, NCIH2009, NCIH2087, NCIH2122, NCIH2126, NCIH2170, NCIH2347, NCIH322, NCIH358, NCIH441, NCIH508, NCIH630, NCIH747, OE19, OE21, OE33, RL952, RWPE1, SCABER, SKMEL3, SNU16, SW1116, SW1417, SW1463, SW1990, SW403, SW48, SW780, SW837, SW900, SW948, SW954, T84, UACC812, UACC893, WIDR, YPAC |
| Mesenchymal | 639V, 769P, A172, BHT101, CAKI2, CAL54, CAL62, CALU1, CCFSTTG1, CGTHW1, DBTRG05MG, DKMG, ES2, GCT, H4, HCC1395, HDMYZ, HOS, HT1080, J82, KHOS240S, MG63, NCIH1792, NCIH2052, NCIH2228, RD, SJSA1, SKLMS1, SKMES1, SNU182, SNU387, SNU423, SNU449, SNU475, SW1088, SW1353, SW1783, SW684, SW756, SW872, SW982, UMUC3, WI38                                                                                                                                                                                                                                                                                                                                                                                                                                                            |
| Mixed       | A204, A427, A673, A7, AN3CA, BE2C, BM1604, C33A, C3A, CALU6, CHL1, CHP212, COLO320DM, COLO320HSR, COLO704, CORL279, D283MED, D341MED, DMS114, DMS273, DMS79, G401, G402, HEC1B, HEP3B, HEPG2, HMCB, MCIXC, MESSA, MIAPACA2, NCIH1092, NCIH1155, NCIH1355, NCIH1436, NCIH1581, NCIH1618, NCIH1651, NCIH1694, NCIH1703, NCIH1770, NCIH1793, NCIH187, NCIH1930, NCIH2030, NCIH2081, NCIH2107, NCIH2171, NCIH2195, NCIH2405, NCIH295R, NCIH446, NCIH524, NCIH650, NCIH661, NCIH69, NCIH716, NCIH720, NCIH748, NCIH810, NCIH82, NCIH838, OV90, RDES, RKOE6, SHP77, SIHA, SJRH30, SKNAS, SKNDZ, SKNEP1, SKNFI, SKUT1, SNU1, SNU398, SNU5, SW1573, TT, Y79                                                                                                                                  |
| Leukemia    | 1A2, ARH77, BC1, BC2, BC3, BDCM, BV173, CA46, CEMC1, CESS, CMLT1, CROAP2, CROAP5, DAUDI, DB, DG75, DOHH2, EB1, EB2, EB3, EM2, GA10, GDM1, HEL9217, HH, HSSULTAN, HT, HUNS1, HUT78, JIYOYE, JM1, JRT3T35, JVM3, KASUMI2, KG1, KU812, L428, MC116, MCCAR, MEC1, MEG01, MHHPREB1, MJ, ML2, MOLT16, MV4II, NALM1, NALM6, NAMALWA, NC37, P3HR1, PLB985, RAJI, RCHACV, REC1, RL, RPMI6666, SEM, SKO007, ST486, SUDHL10, SUDHL16, SUDHL5, SUDHL6, TANOUE, THP1, TOLEDO, U266B1                                                                                                                                                                                                                                                                                                              |
| Melanoma    | A101D, A375, C32TG, COLO829, SH4, SKMEL1, WM115                                                                                                                                                                                                                                                                                                                                                                                                                                                                                                                                                                                                                                                                                                                                      |
